# Supplementary material
Source: ML conference proceedings conference paper supplement (https://proceedings.neurips.cc/paper_files/paper/2023/hash/2a128987fe57b27fa0c7a0b748b0fa1e-Abstract.html)
Supplement: Supplementary file 1 [file 2a128987fe57b27fa0c7a0b748b0fa1e-Supplemental-Conference.pdf]

|     |                                                                                        |           |
|-----|----------------------------------------------------------------------------------------|-----------|
| 532 | <b>Contents</b>                                                                        |           |
| 533 | <b>1 Introduction</b>                                                                  | <b>1</b>  |
| 534 | 1.1 Random Projections (RP) and Sign Random Projections (SignRP) . . . . .             | 1         |
| 535 | 1.2 Count-Sketch and OPORP: Efficient RP-type Alternatives . . . . .                   | 2         |
| 536 | <b>2 Background on Differential Privacy</b>                                            | <b>2</b>  |
| 537 | <b>3 Revisiting Differential Private Random Projection Methods</b>                     | <b>3</b>  |
| 538 | 3.1 Gaussian Noise Mechanism for DP-RP . . . . .                                       | 3         |
| 539 | 3.2 DP-OPORP: A More Efficient Alternative . . . . .                                   | 4         |
| 540 | <b>4 DP-SignRP: Differentially Private Sign Random Projections</b>                     | <b>4</b>  |
| 541 | 4.1 DP-SignRP-RR by Randomized Response . . . . .                                      | 4         |
| 542 | 4.1.1 The flipping probability and calculation of $N_+$ . . . . .                      | 5         |
| 543 | 4.1.2 Utility in angle estimation by DP-SignRP-RR . . . . .                            | 5         |
| 544 | 4.2 DP-SignRP-RR-Smooth Using Smooth Flipping Probability . . . . .                    | 6         |
| 545 | 4.3 DP-SignOPORP with Smooth Flipping Probability . . . . .                            | 7         |
| 546 | <b>5 Experiments</b>                                                                   | <b>8</b>  |
| 547 | <b>6 Conclusion</b>                                                                    | <b>9</b>  |
| 548 | <b>A iDP-SignRP Under Individual Differential Privacy (iDP)</b>                        | <b>16</b> |
| 549 | A.1 Relaxation: Individual Differential Privacy (iDP) . . . . .                        | 16        |
| 550 | A.2 iDP-SignRP-G by Gaussian Noise Addition . . . . .                                  | 16        |
| 551 | A.3 iDP-SignRP-RR by Randomized Response . . . . .                                     | 18        |
| 552 | A.4 Empirical Results on iDP . . . . .                                                 | 19        |
| 553 | <b>B Comparison of Different Projection Matrices and the Benefits of Rademacher RP</b> | <b>20</b> |
| 554 | B.1 Rademacher Projection for DP-RP . . . . .                                          | 20        |
| 555 | B.2 Rademacher Projection for DP-SignRP . . . . .                                      | 20        |
| 556 | <b>C Comparison of DP-RP and DP-OPORP on Inner Product Estimation</b>                  | <b>22</b> |
| 557 | <b>D More Experiment Results</b>                                                       | <b>26</b> |
| 558 | <b>E Deferred Proofs</b>                                                               | <b>28</b> |
| 559 | E.1 Proof of Lemma 4.2 . . . . .                                                       | 31        |
| 560 | E.2 Proof of Proposition 4.4 . . . . .                                                 | 31        |
| 561 | E.3 Proof of Theorem 4.5 . . . . .                                                     | 32        |
| 562 | E.4 Proof of Theorem 4.6 . . . . .                                                     | 33        |

## 563 A iDP-SignRP Under Individual Differential Privacy (iDP)

### 564 A.1 Relaxation: Individual Differential Privacy (iDP)

565 Many extensions or relaxation of DP have been proposed to improve the utility of DP mechanisms.  
566 Examples include Concentrated Differential Privacy [4], Rényi Differential Privacy [10], and Gaus-  
567 sian Differential Privacy [3]. These alternatives provide better composition properties than the com-  
568 position theorems of DP, thus reducing the noise needed [6]. Another possible direction to elevate  
569 the empirical performance of DP is to relax the DP definition by constraining the scope of neigh-  
570 boring datasets depending on the specific use case of DP [12; 2]. In this paper, we consider the concept  
571 called “individual differential privacy” (iDP), also known as “data-centric DP”, as follows.

572 **Definition A.1** (Individual DP [12]). *Given a dataset  $U$ , an algorithm  $\mathcal{M}$  satisfies  $(\epsilon, \delta)$ -iDP for  $U$   
573 if for any dataset  $U'$  that is adjacent to  $U$ , it holds that*

$$\begin{aligned} Pr[\mathcal{M}(U) \in O] &\leq e^\epsilon Pr[\mathcal{M}(U') \in O] + \delta, \\ Pr[\mathcal{M}(U') \in O] &\leq e^\epsilon Pr[\mathcal{M}(U) \in O] + \delta. \end{aligned}$$

574 We should emphasize that, individual DP does not satisfy the rigorous DP definition, as iDP only  
575 focuses on the “point-wise” guarantee of privacy. It protects the neighborhood of a specific dataset of  
576 interest, instead of fulfilling DP requirements for all possible adjacent databases. While iDP does not  
577 provide the same level of privacy protection as the “worst-case” standard DP, it might be sufficient  
578 in certain application scenarios, e.g., data publishing/release, when the procedure is non-interactive  
579 and the released dataset is indeed the target that one is interested in privatizing. We discuss it in our  
580 work as iDP may provide another direction/option for balancing the trade-off between privacy and  
581 utility in practice, based on specific applications.

582 The intuition of iDP is that, while the standard DP (Definition 2.1) requires indistinguishability  
583 between any pair of neighboring databases, in some practical scenarios, the data custodian only holds  
584 one “ground truth” database  $U$  that needs to be protected. Limiting the scope of the neighborhood  
585 could be reasonable in certain practical scenarios. The “indistinguishability” requirement is only cast  
586 on  $U$  and its neighbors specifically, instead of on any possible dataset. iDP has achieved excellent  
587 utility for computing robust statistics at small  $\epsilon$  [12].

588 For the DP algorithms that have been discussed previously in this paper, we first note that, for DP-RP  
589 and DP-OPORP, the local sensitivity at any  $u \in \mathcal{U}$  equals the global sensitivity. In other words, iDP  
590 does not help improve DP-RP and DP-OPORP. Also, we will soon discuss the reason why SignRP  
591 can be much better than SignOPORP under iDP. Therefore, we will mainly investigate the SignRP  
592 algorithms under iDP. Because the “indistinguishability” requirement of DP is only for  $U$  and its  
593 neighbors locally, operationally, for SignRP, iDP essentially follows the local flipping probability  
594 (Section 4.2 and Figure 1) when computing the perturbation level, which can be much smaller than  
595 that required by the standard DP.

596 We propose two iDP-SignRP methods, based on noise addition and sign flipping, respectively. Both  
597 approaches share the same key idea of iDP, that is, many signs of the projected values do not need  
598 perturbations. This can be seen from Figure 1, where the “local flipping probability” is non-zero  
599 only in the regime when the projected data is near 0 (i.e.,  $L = 1$  in Algorithm 4). Since in other  
600 cases the local flip probability is zero, perturbation is not needed. As a result, out of  $k$  projections,  
601 only a fraction of the projected values needs to be perturbed. This significantly reduces the noise  
602 injected to SignRP and boosts the utility by a very large margin.

### 603 A.2 iDP-SignRP-G by Gaussian Noise Addition

604 In Algorithm 6, we present the iDP-SignRP-G method for one data vector  $u$ . We use the “local  
605 flipping probability” (e.g., in Figure 1) to choose which projections are perturbed before taking  
606 signs. After applying random projection to get  $k$  projected values, we do the following steps:

- 607 1. We compute noise-indicators  $(I_1, \dots, I_k)$  for each projected value in  $x = \frac{1}{\sqrt{k}} W^T u$  using  
608 Algorithm 7. Denote  $\mathcal{A} = \{I_j : I_j = 1, j = 1, \dots, k\}$  and  $N_+ = |\mathcal{A}|$ . This is the maximal  
609 number of different signs of  $x$  and  $x' = W^T u', \forall u' \in Nb(u)$ .

---

**Algorithm 6:** iDP-SignRP-G (DP-SignRP with Gaussian noise)

---

- 1 **Input:** Data  $u \in [-1, 1]^p$ ; Privacy parameters  $\epsilon > 0, \delta \in (0, 1)$ ; Number of projections  $k$
  - 2 **Output:** Differentially private sign random projections
  - 3 Apply RP by  $x = \frac{1}{\sqrt{k}}W^T u$ , where  $W \in \mathbb{R}^{p \times k}$  is a random Rademacher matrix
  - 4 For every projected value in  $x$ , compute  $(I_1, \dots, I_k)$  by Algorithm 7
  - 5 Let  $\mathcal{A} = \{I_j : I_j = 1, j = 1, \dots, k\}$  and  $\tilde{N}_+ = |\mathcal{A}|$
  - 6 Compute sensitivity  $\Delta_2 = \beta \sqrt{\frac{\tilde{N}_+}{k}}$
  - 7 Compute  $\sigma$  by Theorem 3.2 with  $\Delta_2$  and privacy budget  $\epsilon$  and  $\delta$
  - 8 Compute  $\tilde{s}_j = \begin{cases} \text{sign}(x_j), & j \notin \mathcal{A} \\ \text{sign}(x_j + G), & j \in \mathcal{A} \end{cases}$ , where  $G \sim N(0, \sigma^2)$  is iid Gaussian noise
  - 9 Return  $\tilde{s} = [\tilde{s}_1, \dots, \tilde{s}_k]$
- 

---

**Algorithm 7:** Compute noise-indicator of iDP-SignRP-G for one projection

---

- 1 **Input:** Data  $u \in [-1, 1]^p$ ; one projected value  $z$ ; adjacency parameter  $\beta$
  - 2 **Output:** Indicator  $I$  w.r.t. projection  $w$  for data vector  $u$
  - 3  $I = 0$
  - 4 **If**  $\beta/\sqrt{k} \geq |z|$
  - 5      $I = 1$
  - 6 **End If**
- 

- 610     2. We compute the sensitivity  $\Delta_2 = \beta \max_{i=1, \dots, p} \|W_{[i, \mathcal{A}]}\|$ , where  $W_{[i, \mathcal{A}]}$  denotes the  $i$ -th
- 611         row of  $W$  indexed at  $\mathcal{A}$ , which is an  $N_+$ -dimensional vector.
- 612     3. We use the optimal Gaussian mechanism (Theorem 3.2) to compute  $\sigma$ , with  $\Delta_2$  computed
- 613         above and privacy parameters  $(\epsilon, \delta)$ .
- 614     4. For  $j = 1, \dots, k$ , if  $j \notin \mathcal{A}$ , we take  $\tilde{s}_j = \text{sign}(x_j)$ ; if  $j \in \mathcal{A}$ , we take  $\tilde{s}_j = \text{sign}(x_j + G)$
- 615         where  $G \sim N(0, \sigma^2)$  is a Gaussian noise. Finally we output  $\tilde{s} = [\tilde{s}_1, \dots, \tilde{s}_k]$ .

616 Let's explain the intuition behind DP-SignRP-G. Since a neighboring data vector  $u'$  only differs  
617 from  $u$  in one dimension by at most  $\beta$ , for each single projection  $w$ , when  $\beta \max_{i=1, \dots, p} |w_i| \leq$   
618  $|w^T u|$ , there is no neighbor  $u'$  of  $u$  that may change the sign of the projected value of  $u$ , i.e.,  
619  $\text{sign}(w^T u') \neq \text{sign}(w^T u)$ . In other words, when  $\beta \max_{i=1, \dots, p} |w_i| \leq |w^T u|$ , no noise is needed  
620 for this projected value to attain iDP. This is the reason why we call the output of Algorithm 7 a  
621 "noise-indicator". Consequently, in step 4 of iDP-SignRP-G it suffices to add Gaussian noise only  
622 to those projected values  $x_j$  with  $j \in \mathcal{A}$ , instead of to all  $k$  projections as in DP-RP-G-OPT.

623 **Theorem A.1** (iDP-SignRP-G). *Algorithm 6 is  $(\epsilon, \delta)$ -iDP for data  $u$ .*

624 *Proof.* For a data vector  $u$ , let  $Nb(u)$  be its neighbor set with vector that differs from  $u$  by at most  $\beta$   
625 in one dimension. Denote  $x = \frac{1}{\sqrt{k}}W^T u$  and  $x' = \frac{1}{\sqrt{k}}W^T u'$ . Let  $(I_1, \dots, I_k)$  be the noise-indicators  
626 from Algorithm 7 and  $\mathcal{A} = \{i : I_i = 1\}$ ,  $\tilde{N}_+ = |\mathcal{A}|$ . Consider the two sets separately:

- 627     • For  $j \in [k] \setminus \mathcal{A}$ , by the condition  $\beta/\sqrt{k} \leq |z|$ , we know that  $\forall u' \in Nb(u)$ , it holds that
- 628          $\text{sign}(x_j) = \text{sign}(x'_j)$ .
- 629     • For  $j \in \mathcal{A}$ , consider the sub-vector  $x_{\mathcal{A}}$ . Adding iid Gaussian noise to  $x_{\mathcal{A}}$  according to
- 630         Theorem 3.2 with  $\Delta_2 = \beta \sqrt{\frac{\tilde{N}_+}{k}}$  ensures the  $(\epsilon, \delta)$ -DP of  $x_{\mathcal{A}}$ . By the post processing
- 631         property of DP, we know that  $\text{sign}(x_{\mathcal{A}})$  is also  $(\epsilon, \delta)$ -DP. Thus, for any  $Q \in \{-1, 1\}^{N_+}$ ,
- 632         we have  $\Pr(\text{sign}(x_{\mathcal{A}}) = Q) - e^\epsilon \Pr(\text{sign}(x'_{\mathcal{A}}) = Q) \leq \delta, \forall u' \in Nb(u)$ .

633 Combining two parts, we have for any  $Q \in \{-1, 1\}^k$ ,

$$Pr(\text{sign}(x) = Q) - e^\epsilon Pr(\text{sign}(x') = Q) = Pr(\text{sign}(x_{\mathcal{A}}) = Q) - e^\epsilon Pr(\text{sign}(x'_{\mathcal{A}}) = Q) \leq \delta,$$

634 for all  $u' \in Nb(u)$ . By the symmetry of DP (on the sub-vector  $x_{\mathcal{A}}$ ), we also know that  
 635  $Pr(\text{sign}(x') = Q) - e^\epsilon Pr(\text{sign}(x) = Q) \leq \delta$ . This proves the  $(\epsilon, \delta)$ -iDP by Definition A.1.  $\square$

### 636 A.3 iDP-SignRP-RR by Randomized Response

---

#### Algorithm 8: iDP-SignRP-RR

---

- 1 **Input:** Data  $u \in [-1, 1]^p$ , privacy parameters  $\epsilon > 0$ ,  $0 < \delta < 1$ , number of projections  $k$
  - 2 **Output:** Differentially private sign random projections
  - 3 Apply RP by  $x = \frac{1}{\sqrt{k}} W^T u$ , where  $W \in \mathbb{R}^{p \times k}$  is a random Rademacher matrix
  - 4 For every column in  $W$ , compute  $(I_1, \dots, I_k)$  by Algorithm 7
  - 5 Let  $\mathcal{A} = \{I_j : I_j = 1, j = 1, \dots, k\}$  and  $\tilde{N}_+ = |\mathcal{A}|$
  - 6 Compute  $\tilde{s}_j = \begin{cases} \text{sign}(x_j), & j \notin \mathcal{A} \\ \text{sign}(x_j), & j \in \mathcal{A} \text{ with prob. } \frac{e^{\epsilon'}}{e^{\epsilon'}+1} \\ -\text{sign}(x_j), & j \in \mathcal{A} \text{ with prob. } \frac{1}{e^{\epsilon'}+1} \end{cases}$  for  $j = 1, \dots, k$ , with  $\epsilon' = \epsilon/\tilde{N}_+$
  - 7 Return  $\tilde{s}$  as the DP-SignRP of  $u$
- 

637 Similar to Section 4, we also have an iDP-SignRP-RR method with pure  $\epsilon$ -DP guarantee by ran-  
 638 domly flipping the signs after SignRP, as summarized in Algorithm 3. After we apply random  
 639 projection  $x = \frac{1}{\sqrt{k}} W^T u$ , we call the same procedure as in iDP-SignRP-G to determine set  $\mathcal{A}$   
 640 representing the projected values that needs perturbation for iDP. For  $j \notin \mathcal{A}$ , we use the original  
 641  $\tilde{s}_j = \text{sign}(x_j)$ . For  $j \in \mathcal{A}$ , we keep  $\text{sign}(x_j)$  with probability  $\frac{e^{\epsilon'}}{e^{\epsilon'}+1}$  and flip the sign otherwise,  
 642 where  $e^{\epsilon'} = \epsilon/\tilde{N}_+$  with  $\tilde{N}_+ = |\mathcal{A}|$ .

643 **Theorem A.2.** *Algorithm 3 achieves  $\epsilon$ -iDP for data  $u$ .*

644 *Proof.* The high-level proof idea is similar to that of Theorem A.1. For  $u \in [-1, 1]^p$  let  $u'$  be an  
 645  $\beta$ -neighboring data. Let  $s = \text{sign}(W^T u) \in \{-1, +1\}^k$ ,  $s' = \text{sign}(W^T u') \in \{-1, +1\}^k$ , and  
 646 denote  $\tilde{s}$  and  $\tilde{s}'$  as the randomized output of  $s$  and  $s'$  by Algorithm 3, respectively. Consider  $\mathcal{A}$   
 647 in Algorithm 3. By Algorithm 7, we know that for  $j \notin \mathcal{A}$ ,  $Pr(\tilde{s}_j = \tilde{s}'_j) = Pr(s_j = s'_j) = 1$ ,  
 648  $\forall u' \in Nb(u)$ . For projections in  $\mathcal{A}$ , denote  $S = \{j \in \mathcal{A} : s_j \neq s'_j\}$  and  $S^c = \mathcal{A} \setminus S$ . For any  
 649 vector  $y \in \{-1, +1\}^k$ , we further define  $S_0 = \{j \in S : s_j = y_j\}$ ,  $S_1 = \{j \in S : s_j \neq y_j\}$ ,  
 650  $S_0^c = \{j \in S^c : s_j = y_j\}$  and  $S_1^c = \{j \in S^c : s_j \neq y_j\}$ . Since the  $k$  projections are independent,  
 651 by composition we have

$$\begin{aligned} \log \frac{Pr(\tilde{s} = y)}{Pr(\tilde{s}' = y)} &= \log \frac{\prod_{j \notin \mathcal{A}} Pr(\tilde{s}_j = y_j) \prod_{j \in S_0^c} \frac{e^{\epsilon'}}{e^{\epsilon'}+1} \prod_{j \in S_1^c} \frac{1}{e^{\epsilon'}+1} \prod_{j \in S_0} \frac{e^{\epsilon'}}{e^{\epsilon'}+1} \prod_{j \in S_1} \frac{1}{e^{\epsilon'}+1}}{\prod_{j \notin \mathcal{A}} Pr(\tilde{s}'_j = y_j) \prod_{j \in S_0^c} \frac{e^{\epsilon'}}{e^{\epsilon'}+1} \prod_{j \in S_1^c} \frac{1}{e^{\epsilon'}+1} \prod_{j \in S_0} \frac{1}{e^{\epsilon'}+1} \prod_{j \in S_1} \frac{e^{\epsilon'}}{e^{\epsilon'}+1}} \\ &\leq \log \frac{\prod_{j \in S} \frac{e^{\epsilon'}}{e^{\epsilon'}+1}}{\prod_{j \in S} \frac{1}{e^{\epsilon'}+1}} = |S| \epsilon' \leq \tilde{N}_+ \epsilon' = \epsilon, \end{aligned}$$

652 which proves the  $\epsilon$ -iDP according to Definition A.1.  $\square$

653 The number of projections that requires noise addition  $\tilde{N}_+$  is also tightly related to the  $P_+(\|u\|, p)$   
 654 (Proposition 4.4 and (5)). Particularly,  $\tilde{N}_+$  would be small when the data has relatively large norm  
 655 compared with the change in neighboring data  $\beta$ . Therefore, both iDP-SignRP methods would have  
 656 better utility when the data norm is large.

657 The reduction from  $k$  to  $\tilde{N}_+$  in iDP not only waives the need to add noise to many projected values,  
 658 but also requires smaller Gaussian noise or smaller flipping probability for the values that need to be

659 perturbed. Specifically, note that in Algorithm 6, the optimal Gaussian mechanism is deployed with  
 660 sensitivity  $\Delta_2 = \beta\sqrt{\frac{N_{\pm}}{k}}$ , instead of  $\Delta_2 = \beta$  as in (3) for DP-RP-G-OPT.

661 **iDP-SignOPORP.** Similarly, we can also apply iDP to the SignOPORP method. Basically, we only  
 662 need to replace  $x$  in Line 3 in both Algorithm 6 and Algorithm 8 by the OPORP of  $u$ . However, we  
 663 note that this iDP-SignOPORP procedure is considerably worse than iDP-SignRP in performance.  
 664 This is because, by the binning step in OPORP, the average scale of each projected value becomes  
 665 much smaller. This implies that in Algorithm 7, the magnitude of  $z$  would be much smaller, so a  
 666 lot more projected values will require perturbation, which leads to a utility loss. This illustrates the  
 667 superiority of SignRP under iDP: since each RP aggregates the whole data vector, SignRP is more  
 668 robust to a small change in the data. Hence, less noise is needed.

#### 669 A.4 Empirical Results on iDP

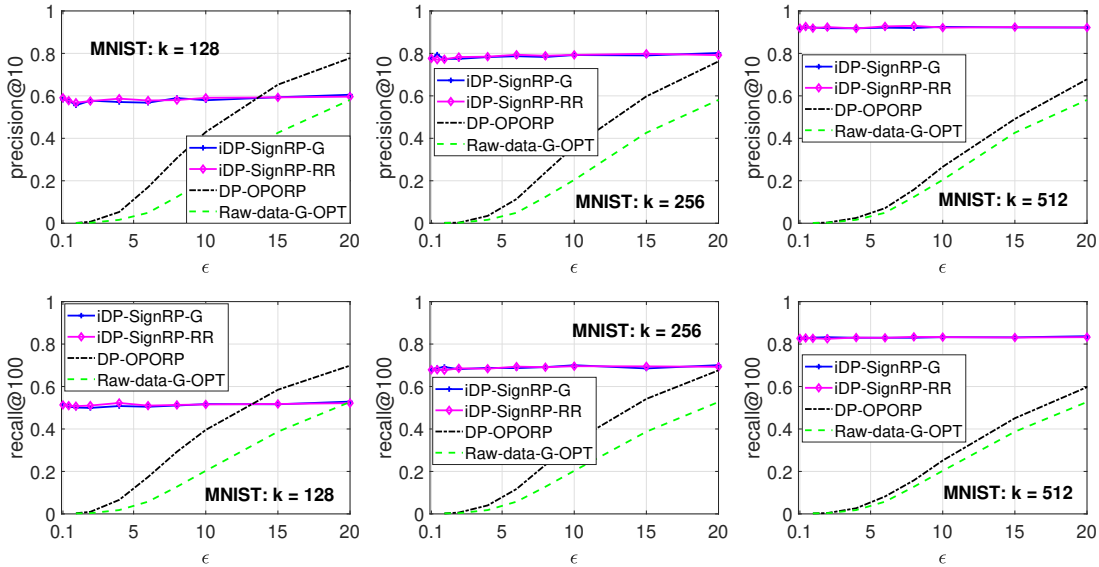

Figure 5: Retrieval on MNIST with iDP-SignRP,  $\beta = 1$ ,  $\delta = 10^{-6}$ .

670 To demonstrate the empirical gain in utility of iDP-SignRP, we conduct the same set of experiments  
 671 as in Section 5. Figure 5 reports the precision and recall on MNIST, and Figure 6 presents the  
 672 SVM test accuracy on WEBSpAM. As we can see, iDP-SignRP achieves very high utility even  
 673 when  $\epsilon < 0.1$ . We see that the curves of iDP-SignRP are almost flat. This is because only a small  
 674 fraction of projected values are perturbed, so the untouched projected values already provides rich  
 675 information for search and classification. In other words, the experimental results illustrate that the  
 676 SignRP itself is already very strong in protecting the individual differential privacy. In other words,  
 677 SignRP itself is already a strong method to protect the privacy of each specific dataset with respect  
 678 to the individual DP, e.g., in non-interactive data publishing tasks.

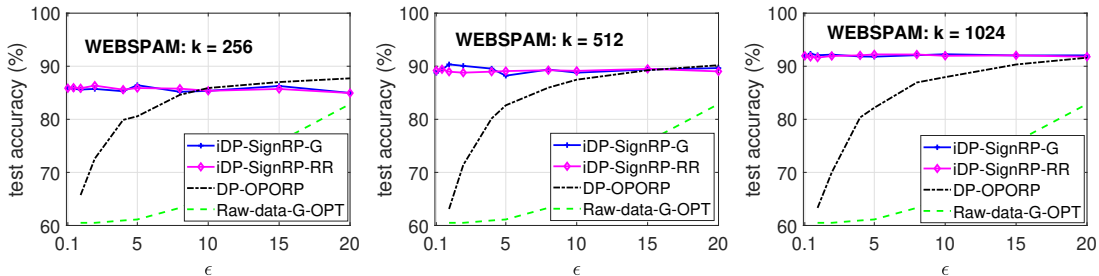

Figure 6: SVM on WEBSpAM with iDP-SignRP,  $\beta = 1$ ,  $\delta = 10^{-6}$ .

679 **B Comparison of Different Projection Matrices and the Benefits of**  
680 **Rademacher RP**

681 Besides Gaussian random projection, we can also adopt other types of projection matrices which  
682 might even work better for DP. The following distributions of  $w_{ij}$  are popular:

- 683 • The uniform distribution,  $\sqrt{3} \times \text{unif}[-1, 1]$ . The  $\sqrt{3}$  factor is placed here to have  $\mathbb{E}(w_{ij}^2) =$   
684 1 by following the convention in the practice of random projections.
- 685 • The “very sparse” distribution, as used in [8]:

$$w_{ij} = \sqrt{s} \times \begin{cases} -1 & \text{with prob. } 1/(2s) \\ 0 & \text{with prob. } 1 - 1/s, \\ +1 & \text{with prob. } 1/(2s) \end{cases} \quad (8)$$

686 which generalizes [1] (for  $s = 1$  and  $s = 3$ ). Note that when  $s = 1$ , it is also called the  
687 “symmetric Bernoulli” distribution or the “Rademacher” distribution.

688 Next, we compare these various types of projection matrices and show that Rademacher (symmetric  
689 Bernoulli) random projection is superior to Gaussian random projection for both DP-RP and DP-  
690 SignRP in that less perturbation is required to achieve the same privacy level.

691 **B.1 Rademacher Projection for DP-RP**

692 From Theorem 3.1 and Theorem 3.2, it is clear that the noise magnitude of Gaussian noise in DP-RP  
693 directly depends on the  $l_2$ -sensitivity  $\Delta_2$ , which, according to (3), equals the largest row norm of the  
694 projection matrix  $W$ . Among the above mentioned distributions, the dense Rademacher projection  
695 ( $s = 1$  in (8)) has  $\Delta_2 = \frac{1}{\sqrt{k}}\beta \times \sqrt{k} = \beta$  which is independent of  $p$ . This could be much smaller  
696 than the dense Gaussian projection (i.e., DP-RP-G-OPT).

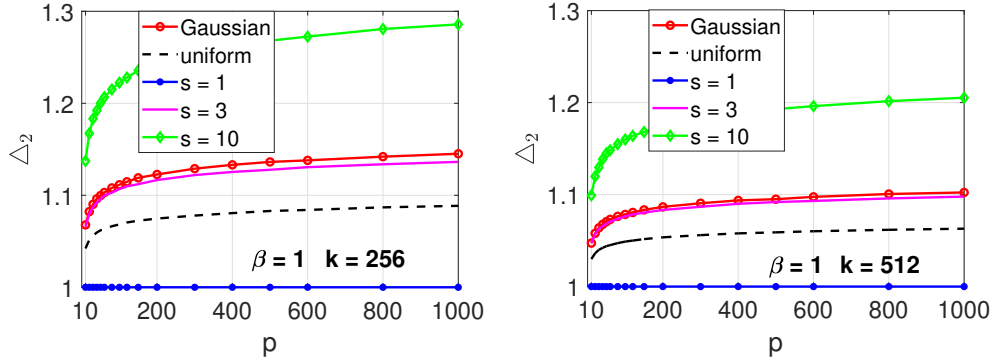

Figure 7: The  $l_2$ -sensitivity  $\Delta_2$  (3) for different types of random projection matrices against the data dimensionality  $p$ , at  $k = 256$  and  $k = 512$ , respectively.  $\beta = 1$ .

697 In Figure 7, we numerically simulate the  $\Delta_2$  of different projection matrices, which shows that  
698 the Rademacher projection produces the smallest sensitivity. This, when plugged into the optimal  
699 Gaussian mechanism (Theorem 3.2), leads to smaller Gaussian noise variance needed.

700 **B.2 Rademacher Projection for DP-SignRP**

701 From our analysis, it is clear that the flipping probability of DP-SignRP (both DP-SignRP-RR and  
702 DP-SignRP-RR-smooth) essentially depends on how concentrated the projected data is around zero.  
703 Particularly,  $N_+$  in Algorithm 3, as given in Proposition 4.4, is a high probability upper bound  
704 on a Binomial random variable with success probability  $Pr(\beta \max_{i=1, \dots, p} |w_i| \geq |w^T u|)$  with  
705  $w \sim N(0, 1)$ . In Algorithm 4,  $L_j = \lceil \frac{|w_j^T u|}{\beta \max_{i=1, \dots, p} |W_{ij}|} \rceil$ . For both quantities, a smaller value leads  
706 to a smaller sign flipping probability and thus better utility.

707  $N_+$  in **DP-SignRP-RR**. We first consider the  $N_+$  in Algorithm 3, which determines the flipping  
708 probability  $\frac{1}{e^{\epsilon/N_+} + 1}$ . Particularly,  $N_+$  in Algorithm 3, as given in Proposition 4.4, is a high proba-  
709 bility upper bound on a Binomial random variable with success probability

$$P_+ = \Pr \left( \beta \max_{i=1, \dots, p} |w_i| \geq |w^T u| \right), \quad (9)$$

710 where  $w$  is the  $p$ -dimensional projection vector. When  $w_i$  is sampled from the Rademacher distribu-  
711 tion, i.e.,  $w_i \in \{-1, +1\}$  with equal probabilities, the probability calculation can be simplified:

$$P_{+,b} = \Pr \left( \beta \max_{i=1, \dots, p} |w_i| \geq \left| \sum_{i=1}^p w_i u_i \right| \right) = \Pr \left( \beta \geq \left| \sum_{i=1}^p w_i u_i \right| \right) \approx 2\Phi \left( \frac{\beta}{\|u\|} \right) - 1. \quad (10)$$

712 Based on the central limit theorem, the normal approximation (10) is accurate unless  $p$  is very small.  
713 Recall that, when  $w_i$ 's are sampled from the Gaussian distribution, we can calculate an upper bound  
714 in (21), which is re-written as below:

$$P_{+,g} = \Pr \left( \beta \max_{i=1, \dots, p} |w_i| \geq \left| \sum_{i=1}^p w_i u_i \right| \right) \leq \int_0^\infty 2p[2\Phi(t) - 1]^{p-1} [2\Phi(\beta t / \|u\|) - 1] \phi(t) dt. \quad (11)$$

715 Next, we provide a simulation study to justify the approximation and compare different distributions  
716 in terms of their impact on the probability (9), for  $\beta = 1$  as well as  $\beta = 0.1$ . For simplicity, we  
717 simulate the data as a  $p$ -dimensional vector of uniform random numbers sampled from  $unif[-1, 1]$ .  
718 We experiment with five different choices of  $w$ : the standard Gaussian, the uniform, the ‘‘very sparse’’  
719 distribution (8) with  $s = 1$ ,  $s = 3$ , and  $s = 10$ . We vary  $p$  from 10 to 1000. For each case, we repeat  
720 the simulations  $10^7$  times to ensure sufficient accuracy. Figure 8 verifies that the two approximations  
721 (10) and (11) are accurate. In Figure 9, we provide the curves for more types of projection matrices.  
722 From both figures, we clearly see that using the Rademacher projection can considerably reduce  
723 (9) compared with Gaussian (and other) projections, leading to smaller  $N_+$  value. This typically  
724 implies better utility.

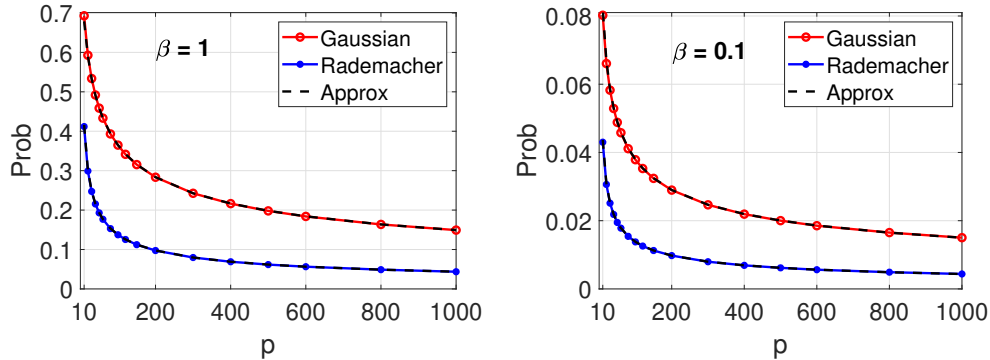

Figure 8: Simulations for evaluating (10) and (11), using two choices for  $w$ : the Gaussian distribution and the Rademacher distribution (i.e., (8) with  $s = 1$ ). We plot the two upper bounds (10) and (11) as black dashed curves, which both overlap with their corresponding simulations.

725  $L_j$  in **DP-SignRP-RR-smooth**. Similarly, we numerically evaluate the  $L_j$  in Algorithm 4. We run  
726 Algorithm 4 with  $k = 512$ , which gives 512  $L_j$  values. In Figure 10, we plot the proportion (or  
727 the approximated distribution) of the values of  $L_j$  among  $k$  projections. As we see, Rademacher  
728 projection produces least number of small  $L_j$  values, and largest number of higher  $L_j$  values. As  
729 the smooth flipping probability equals  $\frac{1}{\exp(\frac{L_j}{k}\epsilon) + 1}$ , larger  $L_j$  leads to smaller probability of sign  
730 flipping. Hence, Rademacher is again the best choice for the projection matrix.

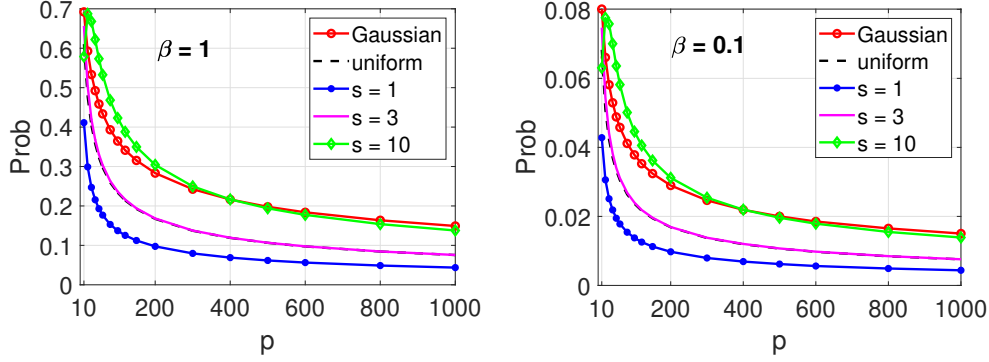

Figure 9: Simulations (same as in Figure 9) for evaluating (9), using five different choices for  $w$ : the Gaussian, the uniform, the “very sparse” distribution (8) with  $s = 1, 3$  and 10.  $s = 1$  is the Rademacher distribution. The data vector is simulated by sampling each entry from  $\text{unif}[-1, 1]$ .

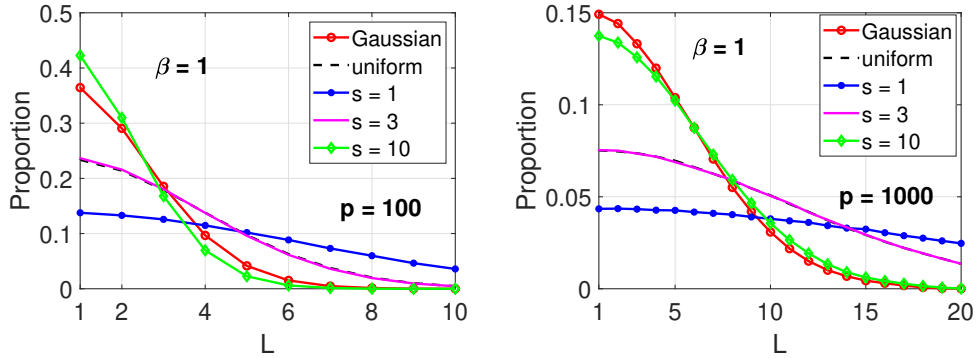

Figure 10: Simulations for evaluating  $L_j$  in Algorithm 4, using different choices for  $w$ .  $s = 1$  is the Rademacher distribution. Left:  $p = 100$ , right:  $p = 1000$ . The  $y$ -axis is the proportion (normalized histogram) of the values of all the  $L_j$ ,  $j = 1, \dots, k$  computed using  $k = 512$  projected samples.

## 731 C Comparison of DP-RP and DP-OPORP on Inner Product Estimation

732 In this section, we theoretically compare DP-RP and DP-OPORP. In Section B, we have shown  
 733 that Rademacher projection requires lowest noise magnitude. Thus, we consider DP-RP with  
 734 Rademacher projections here. For clarity, we summarize the algorithm in Algorithm 9. We name it  
 735 “DP-RP-G-OPT-B”, where “G” stands for the Gaussian noise mechanism and “B” stands for “sym-  
 736 metric Bernoulli” projections.

---

### Algorithm 9: DP-RP-G-OPT-B

---

- 1 **Input:** Data  $u \in [-1, 1]^p$ , privacy parameters  $\epsilon > 0$ ,  $\delta \in (0, 1)$ , number of projections  $k$
  - 2 **Output:**  $(\epsilon, \delta)$ -differentially private random projections  $\tilde{x} \in \mathbb{R}^k$
  - 3 Apply RP  $x = \frac{1}{\sqrt{k}} W^T u$ , where  $W \in \mathbb{R}^{p \times k}$  is a random Rademacher matrix
  - 4 Generate iid random noise vector  $G \in \mathbb{R}^k$  following  $N(0, \sigma^2)$  where  $\sigma$  is obtained by  
Theorem 3.2 with  $\Delta_2 = \beta$
  - 5 Return  $\tilde{x} = x + G$
- 

737 In our analysis, for simplicity we assume the data are normalized, i.e., the data vector has  $l_2$  norm  
 738 equal to 1. In this case, the inner product is also the cosine. The baseline method is the most  
 739 straightforward: we add optimal Gaussian noise to each dimension of the original data (Raw-data-  
 740 G-OPT). For this strategy, the sensitivity is also  $\Delta_2 = \beta$ . This means, when we compare all three  
 741 methods: Raw-data-G-OPT, DP-RP-G-OPT-B, and DP-OPORP, the noise level  $\sigma$  is the same. This  
 742 makes it convenient to conduct the comparisons, from which we can gain valuable insights.



743 **Theorem C.1** (Raw-data-G-OPT, i.e., adding optimal Gaussian noise on raw data). *Let  $\sigma$  be the*  
744 *solution to (4) with  $\Delta_2 = \beta$ . For any  $u, v \in \mathcal{U}$ , let  $\tilde{u}_i = u_i + a_i$  and  $\tilde{v}_i = v_i + b_i$  be the DP noisy*  
745 *vectors, with  $a_i, b_i \sim N(0, \sigma^2)$  i.i.d. Then, denote  $\hat{g}_{org} = \sum_{i=1}^p \tilde{u}_i \tilde{v}_i$ . We have*

$$\mathbb{E}[\hat{g}_{org}] = \sum_{i=1}^p u_i v_i, \quad \text{Var}(\hat{g}_{org}) = \sigma^2 \sum_{i=1}^p (u_i^2 + v_i^2) + p\sigma^4. \quad (12)$$

746 *Proof.* To add Gaussian noise to the original data, it suffices to find the sensitivity, which, by Defini-  
747 *tion 2.2, is  $\Delta_2 = \beta$ . Thus, the approach is  $(\epsilon, \delta)$ -DP according to the optimal Gaussian mechanism*  
748 *(Theorem 3.2). To compute the mean and variance, consider some  $i \in [p]$ . We have*

$$\mathbb{E}[(u_i + a_i)(v_i + b_i)] = \mathbb{E}[u_i v_i + a_i v_i + b_i u_i + a_i b_i] = u_i v_i.$$

749 Thus, taking the sum implies  $\mathbb{E}[\hat{g}_{org}] = \sum_{i=1}^p u_i v_i$ . For the variance,

$$\mathbb{E}[(u_i + a_i)(v_i + b_i)]^2 = \mathbb{E}[u_i v_i + a_i v_i + b_i u_i + a_i b_i]^2 = u_i^2 v_i^2 + \sigma^2 (u_i^2 + v_i^2) + \sigma^4,$$

750 which leads to

$$\text{Var}((u_i + a_i)(v_i + b_i)) = \sigma^2 (u_i^2 + v_i^2) + \sigma^4.$$

751 Therefore, by independence,

$$\text{Var}(\hat{g}_{org}) = \text{Var}\left(\sum_{i=1}^p (u_i + a_i)(v_i + b_i)\right) = \sigma^2 \sum_{i=1}^p (u_i^2 + v_i^2) + p\sigma^4,$$

752 which proves the claim.  $\square$

753 For DP-RP-G-OPT-B and DP-OPORP, we have the following results.

754 **Theorem C.2** (DP-RP-G-OPT-B inner product estimation). *Let  $\sigma$  be the solution to (4) with  $\Delta_2 = \beta$ .*  
755 *In Algorithm 9, let  $W \in \{-1, 1\}^{p \times k}$  be a Rademacher random matrix. Denote  $x = \frac{1}{\sqrt{k}} W^T u$ ,*  
756  *$y = \frac{1}{\sqrt{k}} W^T v$ , and  $a, b$  are two random Gaussian noise vectors following  $N(0, \sigma^2)$ . Let  $\hat{g}_{rp} =$*   
757  *$\sum_{j=1}^k (x_j + a_j)(y_j + b_j)$ . Then,  $\mathbb{E}[\hat{g}_{rp}] = \sum_{i=1}^p u_i v_i$ , and*

$$\text{Var}(\hat{g}_{rp}) = \sigma^2 \sum_{i=1}^p (u_i^2 + v_i^2) + k\sigma^4 + \frac{1}{k} \left( \sum_{i=1}^p u_i^2 \sum_{i=1}^p v_i^2 + \left( \sum_{i=1}^p u_i v_i \right)^2 - 2 \sum_{i=1}^p u_i^2 v_i^2 \right). \quad (13)$$

758 *Proof.* The conditional mean and variance can be computed as

$$\mathbb{E} \left[ \sum_{j=1}^k (x_j + a_j)(y_j + b_j) \mid x_j, y_j, j = 1, \dots, k \right] = \sum_{j=1}^k x_j y_j,$$

759

$$\text{Var} \left( \sum_{j=1}^k (x_j + a_j)(y_j + b_j) \mid x_j, y_j, j = 1, \dots, k \right) = \sigma^2 \sum_{j=1}^k (x_j^2 + y_j^2) + k\sigma^4,$$

760 where the variance calculation follows from Theorem C.1. Hence, we have

$$\mathbb{E} \left[ \sum_{j=1}^k (x_j + a_j)(y_j + b_j) \right] = \mathbb{E} \left[ \sum_{j=1}^k x_j y_j \right] = \sum_{i=1}^p u_i v_i,$$

761

$$\begin{aligned} \text{Var}(\hat{g}_{rp}) &= \mathbb{E} \left[ \sigma^2 \sum_{j=1}^k (x_j^2 + y_j^2) + k\sigma^4 \right] + \text{Var} \left( \sum_{j=1}^k x_j y_j \right) \\ &= \sigma^2 \sum_{i=1}^p (u_i^2 + v_i^2) + k\sigma^4 + \frac{1}{k} \left( \sum_{i=1}^p u_i^2 \sum_{i=1}^p v_i^2 + \left( \sum_{i=1}^p u_i v_i \right)^2 - 2 \sum_{i=1}^p u_i^2 v_i^2 \right). \quad (14) \end{aligned}$$

762 In the above calculation, the formula of  $\text{Var} \left( \sum_{j=1}^k x_j y_j \right)$  is from the result in [8] with  $s = 1$  for  
763 Rademacher distribution.  $\square$

---

**Algorithm 10: DP-OPORP**


---

- 1 **Input:** Data  $u \in [-1, 1]^p$ , privacy parameters  $\epsilon > 0$ ,  $\delta \in (0, 1)$ , number of projections  $k$
  - 2 **Output:** Differentially private OPORP
  - 3 Apply Algorithm 2 with a random Rademacher projection vector to obtain the OPORP  $x$
  - 4 Set sensitivity  $\Delta_2 = \beta$
  - 5 Generate iid random vector  $G \in \mathbb{R}^k$  following  $N(0, \sigma^2)$  where  $\sigma$  is computed by Theorem 3.2
  - 6 Return  $\tilde{x} = x + G$
- 

764 **Theorem C.3** (DP-OPORP inner product estimation). *Let  $\sigma$  be the solution to (4) with  $\Delta_2 = \beta$ .*  
765 *Let  $w \in \{-1, 1\}^p$  be a Rademacher random vector. In Algorithm 10, let  $x$  and  $y$  be the OPORP*  
766 *of  $u$  and  $v$ , and  $a, b$  be two random Gaussian noise vectors following  $N(0, \sigma^2)$ . Denote  $\hat{g}_{oporp} =$*   
767  *$\sum_{j=1}^k (x_j + a_j)(y_j + b_j)$ . Then,  $\mathbb{E}[\hat{g}_{oporp}] = \sum_{i=1}^p u_i v_i$ , and*

$$Var(\hat{g}_{oporp}) = \sigma^2 \sum_{i=1}^p (u_i^2 + v_i^2) + k\sigma^4 + \frac{1}{k} \left( \sum_{i=1}^p u_i^2 \sum_{i=1}^p v_i^2 + \left( \sum_{i=1}^p u_i v_i \right)^2 - 2 \sum_{i=1}^p u_i^2 v_i^2 \right) \frac{p-k}{p-1}. \quad (15)$$

768 *Proof.* The proof is similar to that of Theorem C.2, with the help of the result in [9]. □

769 The variance reduction factor  $\frac{p-k}{p-1}$  can be quite beneficial when  $p$  is not very large. Also, see [9]  
770 for the normalized estimators for both OPORP and VSRP (very sparse random projections). The  
771 normalization steps can substantially reduce the estimation variance.

772 **Comparison.** For the convenience of comparison, let us assume that the data are row-normalized,  
773 i.e.,  $\|u\|^2 = 1$  for all  $u \in \mathcal{U}$ . Let  $\rho = \sum_{i=1}^p u_i v_i$ . We have

$$\begin{aligned} Var(\hat{g}_{org}) &= 2\sigma^2 + p\sigma^4, \\ Var(\hat{g}_{rp}) &= 2\sigma^2 + k\sigma^4 + \frac{1}{k} \left( 1 + \rho^2 - 2 \sum_{i=1}^p u_i^2 v_i^2 \right), \\ Var(\hat{g}_{oporp}) &= 2\sigma^2 + k\sigma^4 + \frac{1}{k} \left( 1 + \rho^2 - 2 \sum_{i=1}^p u_i^2 v_i^2 \right) \frac{p-k}{p-1}. \end{aligned}$$

774 For high-dimensional data (large  $p$ ), we see that  $\hat{g}_{rp}$  and  $\hat{g}_{oporp}$  has roughly the same variance,  
775 approximately  $2\sigma^2 + k\sigma^4 + \frac{1}{k}$ . We would like to compare this with  $Var(\hat{g}_{org}) = 2\sigma^2 + p\sigma^4$  the  
776 variance for adding noise directly to the original data.

777 Let's define the ratio of the variances:

$$R = \frac{2\sigma^2 + p\sigma^4}{2\sigma^2 + k\sigma^4 + \frac{1}{k}} \sim \frac{p\sigma^4}{k\sigma^4} = \frac{p}{k} \quad (\text{if } p \text{ is large or } \sigma \text{ is high}) \quad (16)$$

778 to illustrate the benefit of RP-type algorithms (DP-RP and DP-OPORP) in protecting the privacy  
779 of the (high-dimensional) data. If  $\frac{p}{k} = 100$ , then it is possible that the ratio of the variances can  
780 be roughly 100. This would be a huge advantage. Figure 11 plots the ratio  $R$  for  $p = 1000$  and  
781  $p = 10000$  as well as a series of  $k/p$  values, with respect to  $\sigma$ .

782 Figure 11 also illustrates when it might be a good strategy to directly add noise to the original data.  
783 For example, when  $p = 1000$ , the ratio can be below 1 if  $\sigma < 0.1$ . One can numerically verify that,  
784 (in Figure 12) in order for  $\sigma < 0.1$  at  $\Delta_2 = \beta = 1$ , we need  $\epsilon > 100$ . In other words, adding noise  
785 to the raw data might be plausible when  $\epsilon > 100$ . In the literature, however, many DP applications  
786 typically require a much smaller  $\epsilon$ , such as  $\epsilon \in [0.1, 20]$  (e.g., [5; 7]). Therefore, DP-RP and DP-  
787 OPORP is much better (i.e., has much smaller inner product estimation variance) than adding noise  
788 to the raw data in common privacy regimes.

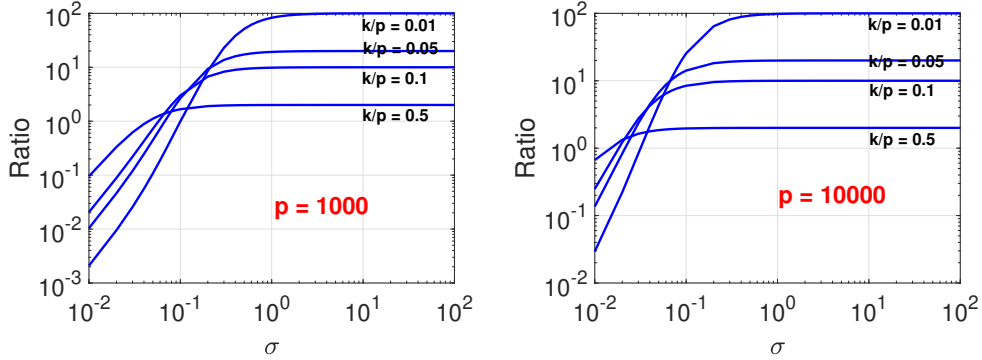

Figure 11: We plot the ratio of variances in (16) for  $p = 1000$  and  $p = 10000$ . We choose  $k$  values with  $k/p \in \{0.01, 0.05, 0.1, 0.5\}$ . Then for any  $\sigma$  value, we are able to compute the ratio  $R$ . For larger  $\sigma$ , we have  $R \sim \frac{p}{k}$  as expected. See Figure 12 for the relationship among  $\sigma$ ,  $\Delta$ , and  $\epsilon$  (and  $\delta$ ).

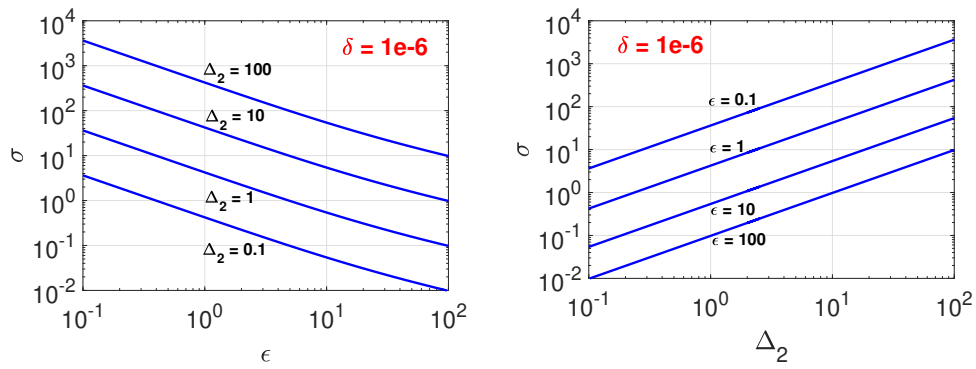

Figure 12: Left panel: the optimal Gaussian noise  $\sigma$  versus  $\epsilon$  for a series of  $\Delta_2$  values, by solving the nonlinear equation (4) in Theorem 3.2, for  $\delta = 10^{-6}$ . Right panel: the optimal Gaussian noise  $\sigma$  versus  $\Delta_2$  for a series of  $\epsilon$  values.

## 789 D More Experiment Results

790 We provide the complete set of plots of our experimental results. In Figure 13 and Figure 14, we  
 791 report the precision@10 and recall@100 curves of DP-RP variants and DP-OPORP on MNIST and  
 792 CIFAR, respectively. In Figure 15, we report the test accuracy on the Webspam dataset of these  
 793 methods. From all plots, we see that DP-RP-G-OPT-B and DP-OPORP perform equally the best on  
 794 all the tasks, significantly better than the strategy of adding Gaussian noise to the raw data.

795 In Figure 16, we report the recall@100 metric of DP-SignOPORP methods in addition to the preci-  
 796 sion@10 metric shown in the main paper. For completeness, we also include the SVM test accuracy  
 797 in Figure 17, which is the same as Figure 4 in the main context.

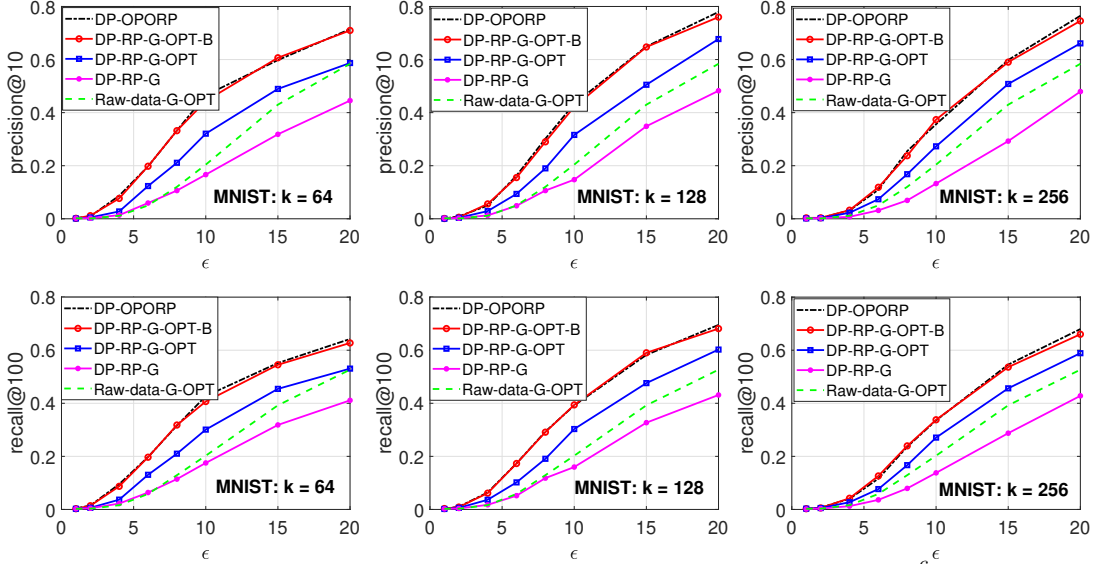

Figure 13: Retrieval recall and precision on MNIST,  $\beta = 1$ ,  $\delta = 10^{-6}$ .

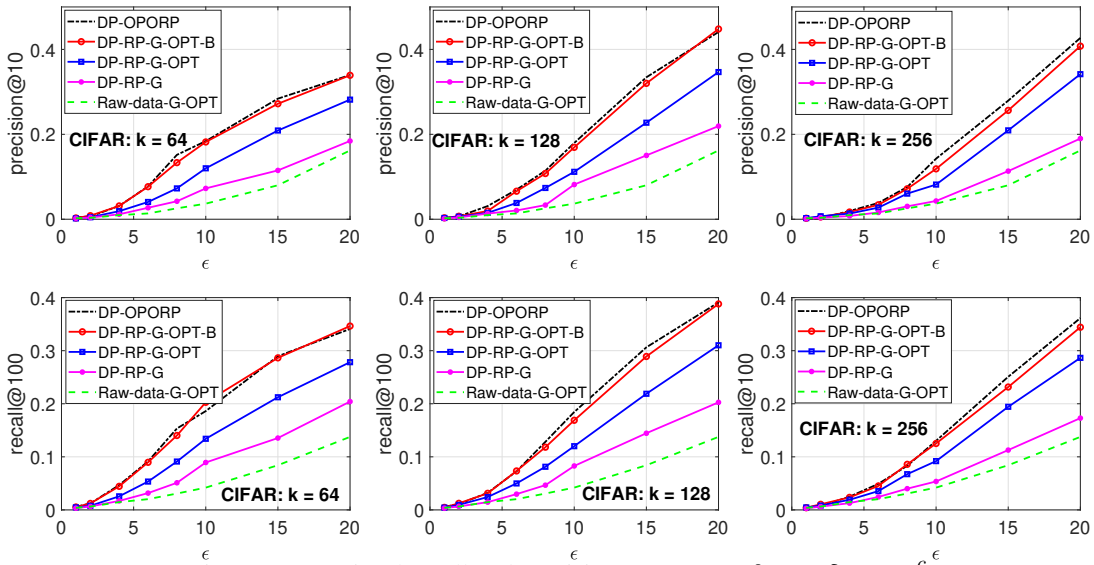

Figure 14: Retrieval recall and precision on CIFAR,  $\beta = 1$ ,  $\delta = 10^{-6}$ .

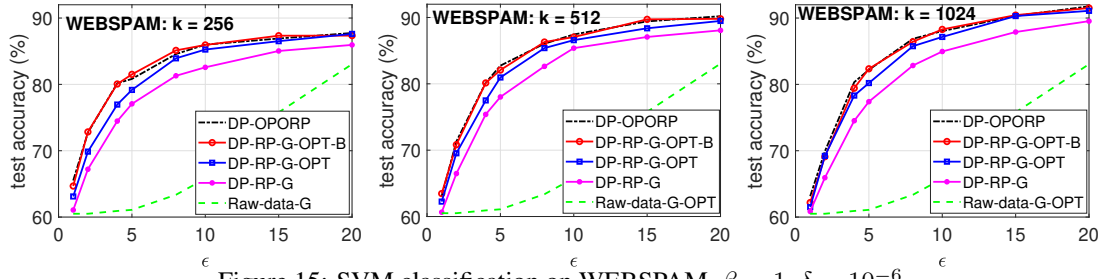

Figure 15: SVM classification on WEBSpAM,  $\beta = 1$ ,  $\delta = 10^{-6}$ .

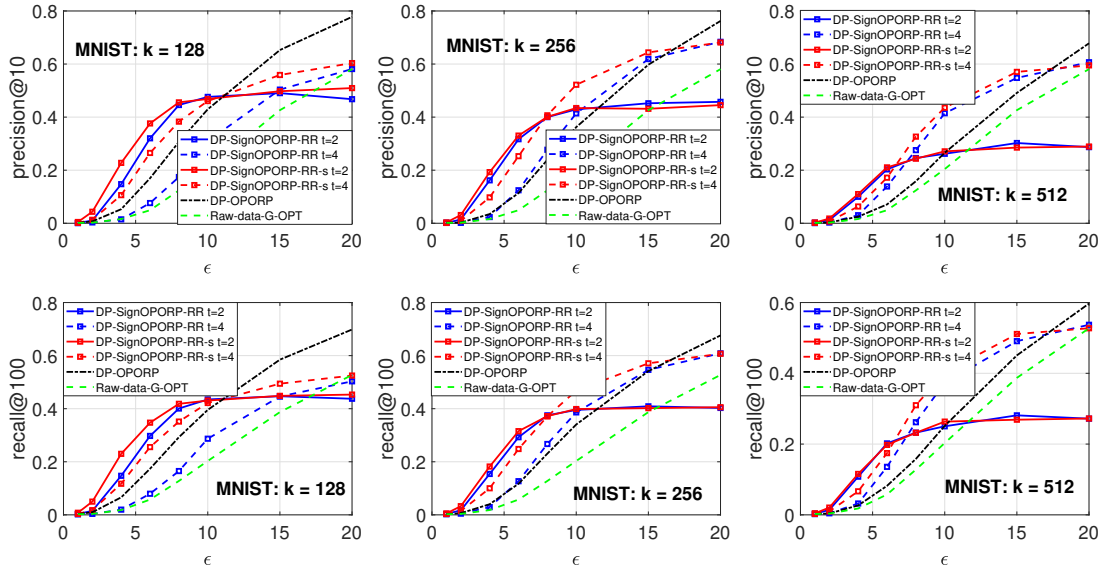

Figure 16: Retrieval on MNIST with DP-SignOPORP-RR and DP-SignOPORP-RR-smooth (in the caption, “-s” stands for “-smooth”). For DP-OPORP and Raw-data-G-OPT, we let  $\delta = 10^{-6}$ .

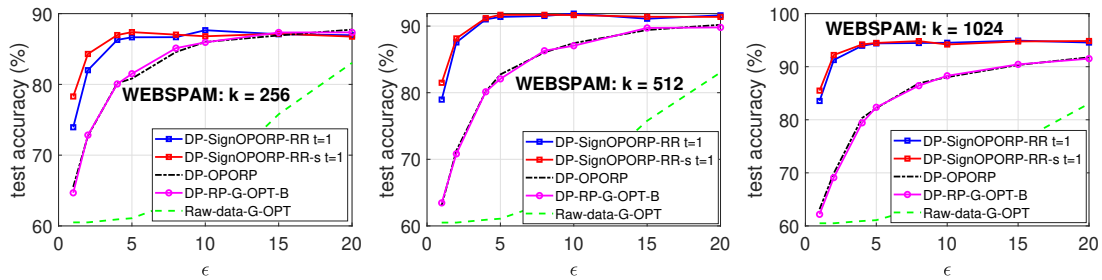

Figure 17: SVM classification on WEBSpAM with DP-SignOPORP-RR and DP-SignOPORP-RR-s. For DP-OPORP and Raw-data-G-OPT, we let  $\delta = 10^{-6}$ .

798 **E Deferred Proofs**

799 The following lemma on Gaussian random variables will be used in our proof for Lemma 4.2, and  
800 may also be of independent interest.

801 **Lemma E.1.** Let  $\begin{pmatrix} X \\ Y \end{pmatrix} \sim N\left(\begin{matrix} \sigma_x^2 & \rho\sigma_x\sigma_y \\ \rho\sigma_x\sigma_y & \sigma_y^2 \end{matrix}\right)$ . Denote  $r = \sigma_x/\sigma_y$ . Then we have:

802 1.  $Pr(|X| > |Y|) = \frac{1}{\pi} \left[ \tan^{-1}\left(\frac{r-\rho}{\sqrt{1-\rho^2}}\right) + \tan^{-1}\left(\frac{r+\rho}{\sqrt{1-\rho^2}}\right) \right]$ . When  $r \leq 1$ , the maximum is  
803 achieved at  $\rho = 0$ , i.e.,  $\max_{\rho} Pr(|X| < |Y|) = \frac{2}{\pi} \tan^{-1}(r)$ .

804 2. The conditional expectation:

$$\mathbb{E}[|X| \mid |X| > |Y|] = \sigma_x \sqrt{\frac{\pi}{2}} \cdot \frac{\frac{r-\rho}{\sqrt{1+r^2-2r\rho}} + \frac{r+\rho}{\sqrt{1+r^2+2r\rho}}}{\tan^{-1}\left(\frac{r-\rho}{\sqrt{1-\rho^2}}\right) + \tan^{-1}\left(\frac{r+\rho}{\sqrt{1-\rho^2}}\right)}.$$

805 3. The conditional tail probability: for any  $r > 0$ ,  $\rho \in (-1, 1)$ , for any  $t > 0$ ,

$$Pr(|X| > t \mid |X| > |Y|) \leq \exp\left(-\frac{t^2}{2\sigma_x^2}\right).$$

806 *Proof.* The bivariate normal density function is

$$\begin{aligned} f(x, y) &= \frac{1}{2\pi\sigma_x\sigma_y\sqrt{1-\rho^2}} \exp\left(-\frac{\frac{x^2}{\sigma_x^2} - \frac{2\rho xy}{\sigma_x\sigma_y} + \frac{y^2}{\sigma_y^2}}{2(1-\rho^2)}\right) \\ &= \frac{1}{2\pi\sigma_x\sigma_y\sqrt{1-\rho^2}} \exp\left(-\frac{x^2}{2\sigma_x^2}\right) \exp\left(-\frac{(\frac{y}{\sigma_y} - \rho\frac{x}{\sigma_x})^2}{2(1-\rho^2)}\right). \end{aligned}$$

807 Therefore, we have  $\mathbb{E}[|X| \mid |X| > |Y|] = \frac{A}{P}$ , with

$$\begin{aligned} A &= \int_{-\infty}^{\infty} \frac{|x|}{\sqrt{2\pi}\sigma_x\sqrt{1-\rho^2}} \exp\left(-\frac{x^2}{2\sigma_x^2}\right) dx \int_{-|x|}^{|x|} \frac{1}{\sqrt{2\pi}\sigma_y} \exp\left(-\frac{(\frac{y}{\sigma_y} - \rho\frac{x}{\sigma_x})^2}{2(1-\rho^2)}\right) dy, \\ P &= \int_{-\infty}^{\infty} \frac{1}{\sqrt{2\pi}\sigma_x\sqrt{1-\rho^2}} \exp\left(-\frac{x^2}{2\sigma_x^2}\right) dx \int_{-|x|}^{|x|} \frac{1}{\sqrt{2\pi}\sigma_y} \exp\left(-\frac{(\frac{y}{\sigma_y} - \rho\frac{x}{\sigma_x})^2}{2(1-\rho^2)}\right) dy. \end{aligned}$$

808 Note that  $P = Pr(|X| > |Y|)$  in the first statement of the theorem. Our calculation will use the  
809 following two identities involving the Gaussian functions [11]:

$$\int_0^{\infty} \phi(ax)\Phi(bx)dx = \frac{1}{2\pi|a|} \left(\frac{\pi}{2} + \tan^{-1}\left(\frac{b}{|a|}\right)\right), \quad (17)$$

$$\int_0^{\infty} x\phi(ax)\Phi(bx)dx = \frac{1}{2\sqrt{2\pi}} \left(1 + \frac{b}{\sqrt{1+b^2}}\right), \quad (18)$$

810 where  $\phi(x)$  and  $\Phi(x)$  are the pdf and cdf of the standard Gaussian distribution.

811 With a proper change of random variables, we can compute  $A$  as

$$\begin{aligned} A &= \int_{-\infty}^{\infty} \frac{|x|}{\sqrt{2\pi}\sigma_x\sqrt{1-\rho^2}} \exp\left(-\frac{x^2}{2\sigma_x^2}\right) dx \int_{\frac{-|x|-\rho\frac{x}{\sigma_x}}{\sqrt{1-\rho^2}}}^{\frac{|x|-\rho\frac{x}{\sigma_x}}{\sqrt{1-\rho^2}}} \sqrt{1-\rho^2} \frac{1}{\sqrt{2\pi}} e^{-s^2} ds \\ &= \int_{-\infty}^{\infty} \frac{|x|}{\sqrt{2\pi}\sigma_x} \exp\left(-\frac{x^2}{2\sigma_x^2}\right) \left[ \Phi\left(\frac{|x|-\rho\frac{x}{\sigma_x}}{\sqrt{1-\rho^2}}\right) - \Phi\left(\frac{-|x|-\rho\frac{x}{\sigma_x}}{\sqrt{1-\rho^2}}\right) \right] dx \\ &= \int_{-\infty}^{\infty} \frac{\sigma_x|t|}{\sqrt{2\pi}} \exp\left(-\frac{t^2}{2}\right) \left[ \Phi\left(\frac{\frac{\sigma_x}{\sigma_y}|t|-\rho t}{\sqrt{1-\rho^2}}\right) - \Phi\left(-\frac{\frac{\sigma_x}{\sigma_y}|t|-\rho t}{\sqrt{1-\rho^2}}\right) \right] dt \\ &:= A_1 - A_2. \end{aligned}$$

812 For the first term we have

$$\begin{aligned}
A_1 &= \sigma_x \left[ \int_0^\infty \frac{t}{\sqrt{2\pi}} \exp\left(-\frac{t^2}{2}\right) \Phi\left(\frac{\frac{\sigma_x - \rho}{\sigma_y} t}{\sqrt{1-\rho^2}}\right) dt + \int_{-\infty}^0 \frac{-t}{\sqrt{2\pi}} \exp\left(-\frac{t^2}{2}\right) \Phi\left(-\frac{\frac{\sigma_x + \rho}{\sigma_y} t}{\sqrt{1-\rho^2}}\right) dt \right] \\
&= \sigma_x \left[ \int_0^\infty \frac{t}{\sqrt{2\pi}} \exp\left(-\frac{t^2}{2}\right) \Phi\left(\frac{\frac{\sigma_x - \rho}{\sigma_y} t}{\sqrt{1-\rho^2}}\right) dt + \int_0^\infty \frac{s}{\sqrt{2\pi}} \exp\left(-\frac{s^2}{2}\right) \Phi\left(\frac{\frac{\sigma_x + \rho}{\sigma_y} s}{\sqrt{1-\rho^2}}\right) ds \right] \\
&= \sigma_x \left[ \frac{1}{2\sqrt{2\pi}} \left( 1 + \frac{\frac{\frac{\sigma_x - \rho}{\sigma_y}}{\sqrt{1-\rho^2}}}{\sqrt{1 + \frac{(\frac{\sigma_x - \rho}{\sigma_y})^2}{1-\rho^2}}} \right) + \frac{1}{2\sqrt{2\pi}} \left( 1 + \frac{\frac{\frac{\sigma_x + \rho}{\sigma_y}}{\sqrt{1-\rho^2}}}{\sqrt{1 + \frac{(\frac{\sigma_x + \rho}{\sigma_y})^2}{1-\rho^2}}} \right) \right] \\
&= \sigma_x \left[ \frac{1}{\sqrt{2\pi}} + \frac{1}{2\sqrt{2\pi}} \left( \frac{r - \rho}{\sqrt{1 + r^2 - 2r\rho}} + \frac{r + \rho}{\sqrt{1 + r^2 + 2r\rho}} \right) \right],
\end{aligned}$$

813 where we denote  $r = \frac{\sigma_x}{\sigma_y}$  and use (18). Similarly, we have that

$$\begin{aligned}
A_2 &= \sigma_x \left[ \int_0^\infty \frac{t}{\sqrt{2\pi}} \exp\left(-\frac{t^2}{2}\right) \Phi\left(-\frac{r + \rho}{\sqrt{1-\rho^2}} t\right) dt + \int_{-\infty}^0 \frac{-t}{\sqrt{2\pi}} \exp\left(-\frac{t^2}{2}\right) \Phi\left(\frac{r - \rho}{\sqrt{1-\rho^2}} t\right) dt \right] \\
&= \sigma_x \left[ \int_0^\infty \frac{t}{\sqrt{2\pi}} \exp\left(-\frac{t^2}{2}\right) \Phi\left(-\frac{r + \rho}{\sqrt{1-\rho^2}} t\right) dt + \int_0^\infty \frac{s}{\sqrt{2\pi}} \exp\left(-\frac{s^2}{2}\right) \Phi\left(-\frac{r - \rho}{\sqrt{1-\rho^2}} s\right) ds \right] \\
&= \sigma_x \left[ \frac{1}{\sqrt{2\pi}} - \frac{1}{2\sqrt{2\pi}} \left( \frac{r - \rho}{\sqrt{1 + r^2 - 2r\rho}} + \frac{r + \rho}{\sqrt{1 + r^2 + 2r\rho}} \right) \right].
\end{aligned}$$

814 Therefore, we obtain

$$A(\rho, r) = A_1 - A_2 = \frac{\sigma_x}{\sqrt{2\pi}} \left( \frac{r - \rho}{\sqrt{1 + r^2 - 2r\rho}} + \frac{r + \rho}{\sqrt{1 + r^2 + 2r\rho}} \right). \quad (19)$$

815 To compute  $P$ , by doing a similar change of variables, we have

$$\begin{aligned}
P &= \int_{-\infty}^\infty \frac{1}{\sqrt{2\pi}} \exp\left(-\frac{t^2}{2}\right) \left[ \Phi\left(\frac{r|t| - \rho t}{\sqrt{1-\rho^2}}\right) - \Phi\left(-\frac{r|t| - \rho t}{\sqrt{1-\rho^2}}\right) \right] dt \\
&:= P_1 - P_2.
\end{aligned}$$

816 Using (17), we obtain

$$\begin{aligned}
P_1 &= \int_0^\infty \frac{1}{\sqrt{2\pi}} \exp\left(-\frac{t^2}{2}\right) \Phi\left(\frac{r - \rho}{\sqrt{1-\rho^2}} t\right) dt + \int_{-\infty}^0 \frac{1}{\sqrt{2\pi}} \exp\left(-\frac{t^2}{2}\right) \Phi\left(-\frac{r + \rho}{\sqrt{1-\rho^2}} t\right) dt \\
&= \int_0^\infty \frac{1}{\sqrt{2\pi}} \exp\left(-\frac{t^2}{2}\right) \Phi\left(\frac{r - \rho}{\sqrt{1-\rho^2}} t\right) dt + \int_0^\infty \frac{1}{\sqrt{2\pi}} \exp\left(-\frac{s^2}{2}\right) \Phi\left(\frac{r + \rho}{\sqrt{1-\rho^2}} s\right) ds \\
&= \frac{1}{2\pi} \left( \frac{\pi}{2} + \tan^{-1}\left(\frac{r - \rho}{\sqrt{1-\rho^2}}\right) \right) + \frac{1}{2\pi} \left( \frac{\pi}{2} + \tan^{-1}\left(\frac{r + \rho}{\sqrt{1-\rho^2}}\right) \right) \\
&= \frac{1}{2} + \frac{1}{2\pi} \left[ \tan^{-1}\left(\frac{r - \rho}{\sqrt{1-\rho^2}}\right) + \tan^{-1}\left(\frac{r + \rho}{\sqrt{1-\rho^2}}\right) \right], \\
P_2 &= \frac{1}{2} - \frac{1}{2\pi} \left[ \tan^{-1}\left(\frac{r - \rho}{\sqrt{1-\rho^2}}\right) + \tan^{-1}\left(\frac{r + \rho}{\sqrt{1-\rho^2}}\right) \right],
\end{aligned}$$

817 which leads to

$$P(\rho, r) = P_1 - P_2 = \frac{1}{\pi} \left[ \tan^{-1}\left(\frac{r - \rho}{\sqrt{1-\rho^2}}\right) + \tan^{-1}\left(\frac{r + \rho}{\sqrt{1-\rho^2}}\right) \right] \quad (20)$$

818 Therefore, we know that

$$\mathbb{E}[|X| \mid |X| > |Y|] = \frac{A(\rho, r)}{P(\rho, r)} = \sigma_x \sqrt{\frac{\pi}{2}} \cdot \frac{\frac{r-\rho}{\sqrt{1+r^2-2r\rho}} + \frac{r+\rho}{\sqrt{1+r^2+2r\rho}}}{\tan^{-1}\left(\frac{r-\rho}{\sqrt{1-\rho^2}}\right) + \tan^{-1}\left(\frac{r+\rho}{\sqrt{1-\rho^2}}\right)},$$

819 with  $r = \sigma_x/\sigma_y$ . We now investigate the derivative of  $P$ . By some algebra, we can show that

$$\frac{\partial P(\rho, r)}{\partial \rho} = \frac{2r\rho(r^2 - 1)}{(1 + r^2 - 2r\rho)(1 + r^2 + 2r\rho)\sqrt{1 - \rho^2}}.$$

820 When  $0 < r \leq 1$ ,  $\frac{\partial P(\rho, r)}{\partial \rho} \geq 0$  when  $\rho \leq 0$  and  $\frac{\partial P(\rho, r)}{\partial \rho} \leq 0$  when  $\rho > 0$ . Therefore,

821  $\max_{\rho} P(\rho, r) = P(0, r) = \frac{2}{\pi} \tan^{-1}(r)$ .

822 **Tail bound.** By our previous calculations, the conditional distribution of  $X$  given  $|X| > |Y|$  is

$$f(x \mid |X| > |Y|) = \frac{\frac{1}{\sqrt{2\pi}} \exp\left(-\frac{x^2}{2}\right) \left[ \Phi\left(\frac{r|x| - \rho x}{\sqrt{1-\rho^2}}\right) - \Phi\left(-\frac{r|x| - \rho x}{\sqrt{1-\rho^2}}\right) \right]}{P}, \quad x \in \mathbb{R},$$

823 with  $P = Pr(|X| > |Y|)$  in (20) the normalizing constant to make the integral equal to 1.

824 The conditional tail probability can be computed as follows. For some  $t > 0$ , by symmetry,

$$\begin{aligned} & Pr(|X| > t, |X| > |Y|) \\ &= 2 \int_t^\infty \frac{1}{\sqrt{2\pi}\sigma_x} \exp\left(-\frac{x^2}{2\sigma_x^2}\right) \left[ \Phi\left(\frac{r|x| - \rho x}{\sqrt{1-\rho^2}}\right) - \Phi\left(-\frac{r|x| - \rho x}{\sqrt{1-\rho^2}}\right) \right] dx \\ &= 2 \int_{\frac{t}{\sigma_x}}^\infty \frac{1}{\sqrt{2\pi}} \exp\left(-\frac{x^2}{2}\right) \left[ \Phi\left(\frac{r|x| - \rho x}{\sqrt{1-\rho^2}}\right) - \Phi\left(-\frac{r|x| - \rho x}{\sqrt{1-\rho^2}}\right) \right] dx \\ &:= 2(\tilde{P}_1 - \tilde{P}_2). \end{aligned}$$

825 For  $\tilde{P}_1$ , using polar coordinates we have

$$\begin{aligned} \tilde{P}_1 &= \frac{1}{2\pi} \int_{\frac{t}{\sigma_x}}^\infty e^{-\frac{x^2}{2}} dx \int_{-\infty}^{\frac{r-\rho}{\sqrt{1-\rho^2}}x} e^{-\frac{y^2}{2}} dy \\ &= \frac{1}{2\pi} \int_{-\frac{\pi}{2}}^{\tan^{-1}\left(\frac{r-\rho}{\sqrt{1-\rho^2}}\right)} d\theta \int_{\frac{t}{\sigma_x \cos(\theta)}}^\infty e^{-\frac{r^2}{2}} r dr \\ &= \frac{1}{2\pi} \int_{-\frac{\pi}{2}}^{\tan^{-1}\left(\frac{r-\rho}{\sqrt{1-\rho^2}}\right)} \exp\left(-\frac{t^2}{2\sigma_x^2 \cos^2(\theta)}\right) d\theta. \end{aligned}$$

826 Similarly,

$$\tilde{P}_2 = \frac{1}{2\pi} \int_{-\frac{\pi}{2}}^{\tan^{-1}\left(-\frac{r+\rho}{\sqrt{1-\rho^2}}\right)} \exp\left(-\frac{t^2}{2\sigma_x^2 \cos^2(\theta)}\right) d\theta.$$

827 Therefore, we obtain

$$\begin{aligned} Pr(|X| > t, |X| > |Y|) &= \frac{1}{\pi} \int_{\tan^{-1}\left(-\frac{r+\rho}{\sqrt{1-\rho^2}}\right)}^{\tan^{-1}\left(\frac{r-\rho}{\sqrt{1-\rho^2}}\right)} \exp\left(-\frac{t^2}{2\sigma_x^2 \cos^2(\theta)}\right) d\theta \\ &= \frac{1}{\pi} \int_{-\tan^{-1}\left(\frac{r+\rho}{\sqrt{1-\rho^2}}\right)}^{\tan^{-1}\left(\frac{r-\rho}{\sqrt{1-\rho^2}}\right)} \exp\left(-\frac{t^2}{2\sigma_x^2 \cos^2(\theta)}\right) d\theta \\ &\leq e^{-\frac{t^2}{2\sigma_x^2}} \frac{1}{\pi} \int_{-\tan^{-1}\left(\frac{r+\rho}{\sqrt{1-\rho^2}}\right)}^{\tan^{-1}\left(\frac{r-\rho}{\sqrt{1-\rho^2}}\right)} d\theta, \end{aligned}$$



828 since  $\cos^2(\theta) \in [0, 1]$ . Notice that  $P$  in (20) can be written as  $P = \frac{1}{\pi} \int_{-\tan^{-1}(\frac{r+\rho}{\sqrt{1-\rho^2}})}^{\tan^{-1}(\frac{r-\rho}{\sqrt{1-\rho^2}})} d\theta$ . Hence,  
 829 we know that the conditional tail probability is

$$Pr(|X| > t | |X| > |Y|) = \frac{Pr(|X| > t, |X| > |Y|)}{Pr(|X| > |Y|)} \leq \exp\left(-\frac{t^2}{2\sigma_x^2}\right), \quad \forall r > 0, \rho \in (-1, 1).$$

830 At the boundaries  $\rho = 1, \rho = -1$ , one can verify  $Pr(|X| > |Y|) = 0$ . This concludes the proof.  $\square$

### 831 E.1 Proof of Lemma 4.2

832 *Proof.* Since  $X_i$ 's are independent, we know that

$$Pr(\max_{i=1, \dots, p} |X_i| < |Y|) = \prod_{i=1}^p Pr(|X_i| < |Y|).$$

833 By Lemma E.1, among all the possible dependency structures, the above probability reaches its  
 834 minimum when every  $X_i$  is independent of  $Y$ . Therefore,  $Pr(\max_{i=1, \dots, p} |X_i| > |Y|) = 1 -$   
 835  $Pr(\max_{i=1, \dots, p} |X_i| < |Y|)$  achieves maximum when  $\rho(X_i, Y) = 0, \forall i = 1, \dots, p$ . Since  $|X_i|$   
 836 follows a half-normal distribution with cdf being  $\text{erf}(\frac{x}{\sqrt{2}\sigma_x})$ , we have

$$Pr(\max_{i=1, \dots, p} |X_i| \leq t) = \text{erf}\left(\frac{t}{\sqrt{2}\sigma_x}\right)^p = \left[2\Phi\left(\frac{x}{\sigma_x}\right) - 1\right]^p,$$

837 and probability density function  $g(x) = 2p[\Phi(\frac{x}{\sigma_x}) - 1]^{p-1} \frac{1}{\sqrt{2\pi}\sigma_x} e^{-\frac{x^2}{2\sigma_x^2}}$ . When  $Y$  is independent of  
 838 all  $X_i$ 's (which gives the upper bound), we have

$$\begin{aligned} Pr(\max_{i=1, \dots, p} |X_i| > |Y|) &= \int_0^\infty 2p \left[\Phi\left(\frac{x}{\sigma_x}\right) - 1\right]^{p-1} \frac{1}{\sqrt{2\pi}\sigma_x} e^{-\frac{x^2}{2\sigma_x^2}} Pr(|Y| < x) dx \\ &= \int_0^\infty 2p \left[\Phi\left(\frac{x}{\sigma_x}\right) - 1\right]^{p-1} \frac{1}{\sqrt{2\pi}\sigma_x} e^{-\frac{x^2}{2\sigma_x^2}} \text{erf}\left(\frac{x}{\sqrt{2}\sigma_y}\right) dx \\ &= \int_0^\infty 2p[2\Phi(t) - 1]^{p-1} [2\Phi(rt) - 1] \phi(t) dt, \end{aligned}$$

839 with a proper change of variables. This gives an upper bound as shown above.  $\square$

### 840 E.2 Proof of Proposition 4.4

841 *Proof.* Consider a single Gaussian projection vector  $w$  with iid  $N(0, 1)$  entries. Since  $w^T u =$   
 842  $\sum_{i=1}^p u_i w_i$  and each  $w_i \sim N(0, 1)$ , we know that  $\begin{pmatrix} \beta w_i \\ x \end{pmatrix} \sim N\left(\begin{matrix} \beta^2 & \rho_i \beta \|u\| \\ \rho_i \beta \|u\| & \|u\|^2 \end{matrix}\right)$  where  $\rho_i =$   
 843  $\frac{u_i}{\|u\|}$  is the correlation coefficient. Since  $|w^T(u - u')| \leq \beta \max_{i=1, \dots, p} |w_i|$  by Definition 2.2 of  
 844  $\beta$ -neighboring (and more generally, when  $\|u - u'\|_1 \leq \beta$ ), we have

$$Pr(\max_{u' \in Nb(u)} |w^T(u - u')| \geq |w^T u|) = Pr(\beta \max_{i=1, \dots, p} |w_i| \geq |w^T u|).$$

845 Note that,  $\beta \max_{i=1, \dots, p} |w_i| \geq |w^T u|$  is a necessary condition for the event that there exists a neigh-  
 846 bor such that  $\text{sign}(w^T u) \neq \text{sign}(w^T u')$ . Denote  $I = \mathbb{1}\{\beta \max_{i=1, \dots, p} |w_i| \geq |w^T u|\}$ . Applying  
 847 Lemma 4.2 with  $r = \beta/\|u\| \leq 1$  yields

$$\mathbb{E}[I] = Pr(\beta \max_{i=1, \dots, p} |w_i| \geq |w^T u|) \leq F_{\|u\|, p} = \int_0^\infty 2p[2\Phi(t) - 1]^{p-1} [2\Phi(rt) - 1] \phi(t) dt \quad (21)$$

848 as given by (5). Let  $I_j$  be the corresponding indicator function w.r.t. each column in the projection  
 849 matrix  $W$ . Denote  $N_+ = \sum_{j=1}^k I_j$ , and by the above reasoning, we know that  $|S| \leq N_+$  where  $S$  is  
 850 defined in the theorem. Since the columns of  $W$  are independent,  $N_+$  follows a *Binomial*( $k, \mathbb{E}[I]$ )

851 distribution with  $k$  trials and success probability  $\mathbb{E}[I]$  bounded as above. Applying Chernoff's bound  
 852 on binomial variable (Lemma 4.3), we obtain

$$Pr(N_+ \geq (1 + \eta)F_{\|u\|,p}k) \leq \exp\left(-\frac{\eta^2 F_{\|u\|,p}k}{\eta + 2}\right).$$

853 Setting the RHS to  $\delta$  gives  $\eta = \frac{\log(1/\delta) + \sqrt{(\log(1/\delta))^2 + 8F_{\|u\|,p}k \log(1/\delta)}}{2F_{\|u\|,p}k}$ . Therefore, with probability  
 854  $1 - \delta$ ,

$$N_+(\|u\|, \delta, k, p) \leq F_{\|u\|,p}k + \frac{1}{2} \left[ \log(1/\delta) + \sqrt{(\log(1/\delta))^2 + 8F_{\|u\|,p}k \log(1/\delta)} \right].$$

855 In addition,  $N_+ \leq k$  trivially. The proof is complete.  $\square$

### 856 E.3 Proof of Theorem 4.5

*Proof.* Let  $s = \text{sign}(W^T u) \in \{-1, +1\}^k$ ,  $s' = \text{sign}(W^T u') \in \{-1, +1\}^k$ . We denote the collision probability of non-private SignRP as

$$P_{SRP} = Pr(s_{1j} = s_{2j}) = 1 - \frac{\cos^{-1}(\rho)}{\pi} = 1 - \frac{\theta}{\pi}.$$

857 Hence, the collision probability of DP-SignRP-RR can be computed as

$$\begin{aligned} \tilde{P} &:= Pr(\tilde{s}_{1j} = \tilde{s}_{2j}) = Pr(s_{1j} = s_{2j}, \text{both change sign or not change sign}) \\ &\quad + Pr(s_{1j} \neq s_{2j}, \text{one sign changes}) \\ &= P_{SRP} \left[ \left( \frac{e^{\epsilon'}}{e^{\epsilon'} + 1} \right)^2 + \left( \frac{1}{e^{\epsilon'} + 1} \right)^2 \right] + 2(1 - P_{SRP}) \frac{e^{\epsilon'}}{(e^{\epsilon'} + 1)^2} \\ &= P_{SRP} \frac{(e^{\epsilon'} - 1)^2}{(e^{\epsilon'} + 1)^2} + \frac{2e^{\epsilon'}}{(e^{\epsilon'} + 1)^2}, \end{aligned}$$

858 which increases linearly in  $P_{SRP}$ . Thus, it holds that

$$\mathbb{E}[\hat{P}_{RR}] = \frac{(e^{\epsilon'} + 1)^2}{(e^{\epsilon'} - 1)^2} \tilde{P} - \frac{2e^{\epsilon'}}{(e^{\epsilon'} - 1)^2} = P_{SRP} = 1 - \frac{\theta}{\pi},$$

859 which implies  $\mathbb{E}[\hat{\theta}_{RR}] = \pi(1 - (1 - \frac{\theta}{\pi})) = \theta$ . To compute the variance, we first estimate  $\theta =$   
 860  $\cos^{-1}(\rho)$  by

$$\hat{\theta} = \pi(1 - \hat{P}_{RR}).$$

861 Then according to the Central Limit Theorem (CLT), for the sample mean of iid Bernoulli's, as  
 862  $k \rightarrow \infty$ , we have

$$\frac{1}{k} \sum_{j=1}^k \mathbb{1}\{\tilde{s}_{1j} = \tilde{s}_{2j}\} \rightarrow N(\tilde{P}, \frac{\tilde{P}(1 - \tilde{P})}{k}).$$

863 As a result, we have  $\hat{\theta} \rightarrow N(\theta, \frac{V_{RR}}{k})$ , where

$$\begin{aligned} V_{RR} &= \frac{\pi^2 (e^{\epsilon'} + 1)^4}{(e^{\epsilon'} - 1)^4} \left[ \left(1 - \frac{\theta}{\pi}\right) \frac{(e^{\epsilon'} - 1)^2}{(e^{\epsilon'} + 1)^2} + \frac{2e^{\epsilon'}}{(e^{\epsilon'} + 1)^2} \right] \left[ \frac{e^{2\epsilon'} + 1}{(e^{\epsilon'} + 1)^2} - \left(1 - \frac{\theta}{\pi}\right) \frac{(e^{\epsilon'} - 1)^2}{(e^{\epsilon'} + 1)^2} \right] \\ &= \frac{\pi^2 (e^{\epsilon'} + 1)^4}{(e^{\epsilon'} - 1)^4} \left[ \left(1 - \frac{\theta}{\pi}\right) \frac{(e^{\epsilon'} - 1)^2}{(e^{\epsilon'} + 1)^2} + \frac{2e^{\epsilon'}}{(e^{\epsilon'} + 1)^2} \right] \left[ \frac{\theta (e^{\epsilon'} - 1)^2}{\pi (e^{\epsilon'} + 1)^2} + \frac{2e^{\epsilon'}}{(e^{\epsilon'} + 1)^2} \right] \\ &= \frac{\pi^2 \theta}{\pi} \left(1 - \frac{\theta}{\pi}\right) + \left(1 - \frac{\theta}{\pi}\right) \frac{2e^{\epsilon'}}{(e^{\epsilon'} - 1)^2} + \frac{\theta}{\pi} \frac{2e^{\epsilon'}}{(e^{\epsilon'} - 1)^2} + \frac{4e^{2\epsilon'}}{(e^{\epsilon'} - 1)^4} \\ &= \theta(\pi - \theta) + \frac{2\pi^2 e^{\epsilon'}}{(e^{\epsilon'} - 1)^2} + \frac{4\pi^2 e^{2\epsilon'}}{(e^{\epsilon'} - 1)^4}. \end{aligned}$$

864 We conclude the proof by replacing  $\epsilon' = \epsilon/N_+$ .  $\square$

865 **E.4 Proof of Theorem 4.6**

866 *Proof.* Let us consider a single projection vector  $w_j = W_{[:,j]}$ . Denote  $x_j = w_j^T u$  and  $x'_j = w_j^T u'$  for  
 867 a neighboring data  $u'$  of  $u$ , and  $s_j = \text{sign}(x_j)$ ,  $s'_j = \text{sign}(x'_j)$ . Also, let  $L_j = \lceil \frac{|x_j|}{\beta \max_{i=1, \dots, p} |W_{ij}|} \rceil$   
 868 and  $L'_j = \lceil \frac{|x'_j|}{\beta \max_{i=1, \dots, p} |W_{ij}|} \rceil$ . W.l.o.g., we can assume  $s_j = 1$  by the symmetry of random projec-  
 869 tion and the symmetry of DP. Consider two cases:

- 870 • Case I:  $L_j \geq 2$ . In this case, we know that  $s'_j = s_j$ , i.e., the change from  $u$  to  $u'$  will not  
 871 change the sign of the projection. Thus, in Algorithm 4, we have

$$\frac{Pr(\tilde{s}_j = 1)}{Pr(\tilde{s}'_j = 1)} = \exp\left(\frac{L_j - L'_j}{k} \epsilon\right) \frac{\exp\left(\frac{L'_j}{k} \epsilon\right) + 1}{\exp\left(\frac{L_j}{k} \epsilon\right) + 1}.$$

872 By the definition of  $\beta$ -adjacency,  $|L_j - L'_j|$  equals either 0 or 1. When  $L_j = L'_j$ ,  $\frac{Pr(\tilde{s}_j=1)}{Pr(\tilde{s}'_j=1)} =$   
 873 1. When  $L_j - L'_j = 1$ , we have

$$\frac{Pr(\tilde{s}_j = 1)}{Pr(\tilde{s}'_j = 1)} = \frac{\exp\left(\frac{L_j}{k} \epsilon\right) + \exp\left(\frac{1}{k} \epsilon\right)}{\exp\left(\frac{L'_j}{k} \epsilon\right) + 1}.$$

874 Hence, we have  $1 \leq \frac{Pr(\tilde{s}_j=1)}{Pr(\tilde{s}'_j=1)} \leq e^{\frac{\epsilon}{k}}$  by the numeric identity  $1 \leq \frac{a+c}{b+c} \leq \frac{a}{b}$  for  $a \geq b > 0$   
 875 and  $c > 0$ . Thus, by symmetry,  $e^{-\frac{\epsilon}{k}} \leq \frac{Pr(\tilde{s}_j=1)}{Pr(\tilde{s}'_j=1)} \leq e^{\frac{\epsilon}{k}}$ . On the other hand,

$$\frac{Pr(\tilde{s}_j = -1)}{Pr(\tilde{s}'_j = -1)} = \frac{\exp\left(\frac{L'_j}{k} \epsilon\right) + 1}{\exp\left(\frac{L_j}{k} \epsilon\right) + 1}.$$

876 Similarly, when  $L_j = L'_j$ , the ratio equals 1. When  $L_j = L'_j - 1$ , we have  $\frac{Pr(\tilde{s}_j=-1)}{Pr(\tilde{s}'_j=-1)} \leq$   
 877  $\exp\left(\frac{L'_j}{k} \epsilon - \frac{L_j}{k} \epsilon\right) = e^{\frac{\epsilon}{k}}$ . By symmetry we obtain  $e^{-\frac{\epsilon}{k}} \leq \frac{Pr(\tilde{s}_j=-1)}{Pr(\tilde{s}'_j=-1)} \leq e^{\frac{\epsilon}{k}}$ .

- 878 • Case II:  $L_j = 1$ . In this case,  $s_j$  might be different from  $s'_j$ . First, if  $L'_j = 2$ , then the  
 879 above analysis also applies that  $\frac{Pr(\tilde{s}_j=1)}{Pr(\tilde{s}'_j=1)}$  and  $\frac{Pr(\tilde{s}_j=-1)}{Pr(\tilde{s}'_j=-1)}$  are both lower and upper bounded  
 880 by  $e^{-\frac{\epsilon}{k}}$  and  $e^{\frac{\epsilon}{k}}$ , respectively. It suffices to examine the case when  $L'_j = 1$ . In this case, if  
 881  $s'_j = s_j = 1$  then the probability ratios simply equal 1. If  $s'_j = -1$ , we have

$$\frac{Pr(\tilde{s}_j = 1)}{Pr(\tilde{s}'_j = 1)} = \frac{\exp\left(\frac{\epsilon}{k}\right)}{\exp\left(\frac{\epsilon}{k}\right)+1} = e^{\frac{\epsilon}{k}}, \quad \frac{Pr(\tilde{s}_j = -1)}{Pr(\tilde{s}'_j = -1)} = \frac{1}{\exp\left(\frac{\epsilon}{k}\right)+1} = e^{-\frac{\epsilon}{k}}.$$

882 Combining two cases, we have that  $\log \frac{Pr(\tilde{s}_j=t)}{Pr(\tilde{s}'_j=t)} \leq \frac{\epsilon}{k}$ , for  $t = -1, 1$ , and for all  $j = 1, \dots, k$ . That is,  
 883 each single perturbed sign achieves  $\frac{\epsilon}{k}$ -DP. Since the  $k$  projections are independent, by Theorem 2.1,  
 884 we know that the output bit vector  $\tilde{s} = [\tilde{s}_1, \dots, \tilde{s}_k]$  is  $\epsilon$ -DP as claimed.  $\square$

885 **References**

- 886 [1] Dimitris Achlioptas. Database-friendly random projections: Johnson-lindenstrauss with binary  
887 coins. *J. Comput. Syst. Sci.*, 66(4):671–687, 2003.
- 888 [2] Damien Desfontaines and Balázs Pejó. Sok: Differential privacies. *Proc. Priv. Enhancing  
889 Technol.*, 2020(2):288–313, 2020.
- 890 [3] Jinshuo Dong, Aaron Roth, and Weijie J Su. Gaussian differential privacy. *Journal of the  
891 Royal Statistical Society Series B: Statistical Methodology*, 84(1):3–37, 2022.
- 892 [4] Cynthia Dwork and Guy N Rothblum. Concentrated differential privacy. *arXiv preprint  
893 arXiv:1603.01887*, 2016.
- 894 [5] Justin Hsu Marco Gaboardi Andreas Haeberlen and Sanjeev Khanna. Differential privacy: An  
895 economic method for choosing epsilon. *arXiv preprint arXiv:1402.3329*, 2014.
- 896 [6] Bargav Jayaraman and David Evans. Evaluating differentially private machine learning in  
897 practice. In *Proceedings of the 28th USENIX Security Symposium (USENIX Security)*, pages  
898 1895–1912, Santa Clara, CA, 2019.
- 899 [7] Christopher T Kenny, Shiro Kuriwaki, Cory McCartan, Evan TR Rosenman, Tyler Simko, and  
900 Kosuke Imai. The use of differential privacy for census data and its impact on redistricting:  
901 The case of the 2020 us census. *Science advances*, 7(41):eabk3283, 2021.
- 902 [8] Ping Li, Trevor J Hastie, and Kenneth W Church. Very sparse random projections. In *Proceed-  
903 ings of the 12th ACM SIGKDD international conference on Knowledge discovery and data  
904 mining (KDD)*, pages 287–296, Philadelphia, PA, 2006.
- 905 [9] Ping Li and Xiaoyun Li. OPORP: One permutation + one random projection. *arXiv preprint  
906 arXiv:2302.03505*, 2023.
- 907 [10] Ilya Mironov. Rényi differential privacy. In *Proceedings of the 30th IEEE Computer Security  
908 Foundations Symposium (CSF)*, pages 263–275, Santa Barbara, CA, 2017.
- 909 [11] Donald Bruce Owen. A table of normal integrals: A table. *Communications in Statistics-  
910 Simulation and Computation*, 9(4):389–419, 1980.
- 911 [12] Jordi Soria-Comas, Josep Domingo-Ferrer, David Sánchez, and David Megías. Individual  
912 differential privacy: A utility-preserving formulation of differential privacy guarantees. *IEEE  
913 Trans. Inf. Forensics Secur.*, 12(6):1418–1429, 2017.
